# Supplementary material for: Promoter architecture and transcriptional regulation of Abf1-dependent ribosomal protein genes in Saccharomyces cerevisiae
Source: PubMed Central journal article supplement — Nucleic Acids Res. 2016 Mar 25;44(13):6113–26. doi: 10.1093/nar/gkw194 (PMC5291244; doi:10.1093/nar/gkw194), 2016-03-25
Supplement: supp_gkw194_nar-00546-x-2016-File010.pdf [file supp_gkw194_nar-00546-x-2016-File010.pdf]

# Supplementary figure S1.

Upstream region alignments of Abf1-dependent RP genes considered in this study.

## RPL3

```
RPL3_cerev : -----*-----20-----*-----40-----*-----60-----*-----80-----*-----100-----*----- : 46
RPL3_mikat : -----*-----20-----*-----40-----*-----60-----*-----80-----*-----100-----*----- : 47
RPL3_parad : GCACGTCCTTTTATAACATGGCGTGTAGTGGCGAAGTGAAGTGCCTGCAGCTACTTCTTATTTGAGAGGATTTTCTGGGCAACTTTGCTCAGAAAGGTTGCTCAGCTTT : 114
                                     gag tTTtttGcGGGatAaCtTtTgCTt AGaatcTTtGaaGtTtT

RPL3_cerev : 120-----*-----140-----*-----160-----*-----180-----*-----200-----*-----220----- : 156
RPL3_mikat : 120-----*-----140-----*-----160-----*-----180-----*-----200-----*-----220----- : 159
RPL3_parad : 120-----*-----140-----*-----160-----*-----180-----*-----200-----*-----220----- : 221
aaAgtc acAttaTTTTTCGACA TTTtCtCACTgT CcTccATcCCC TtaaAAAGaAACA c ctttCta cCtCtTTTCT a c gtacacaAga ggaCggccaaT

RPL3_cerev : 240-----*-----260-----*-----280-----*-----300-----*-----320-----*-----340----- : 269
RPL3_mikat : 240-----*-----260-----*-----280-----*-----300-----*-----320-----*-----340----- : 272
RPL3_parad : 240-----*-----260-----*-----280-----*-----300-----*-----320-----*-----340----- : 331
CGAGGCCGAGAGAAAATCCGGAGGAcGgAAAAA TaGaaGtaATtCtcaTgcGGGga CATGCAcGcAGAAccCtC GaaaAcgta aT acActaCatgcTtTg Tat ac a

RPL3_cerev : 360-----*-----380-----*-----400-----*-----420-----*-----440-----*----- : 368
RPL3_mikat : 360-----*-----380-----*-----400-----*-----420-----*-----440-----*----- : 382
RPL3_parad : 360-----*-----380-----*-----400-----*-----420-----*-----440-----*----- : 419
tTTtccgGcC tttcTat tttcT aTg cg Gt GcTgCtcaatcgt AGaaGggCgAaagcaa CgagattgAT c TcT c T tggttTgC

RPL3_cerev : 460-----*-----480-----*-----500-----*-----520-----*-----540-----*-----560-----*----- : 475
RPL3_mikat : 460-----*-----480-----*-----500-----*-----520-----*-----540-----*-----560-----*----- : 489
RPL3_parad : 460-----*-----480-----*-----500-----*-----520-----*-----540-----*-----560-----*----- : 533
TGctttc TtT caaaTGCA TttATgcg attTcttGttaTgcCGCTcgTATcAGCCAcTAcGtTATcAttcta Aa G gagTATACgAaTaTgtacAAaaCTT gT

RPL3_cerev : 580-----*-----600-----*-----620-----*-----640-----*-----660-----*-----680----- : 588
RPL3_mikat : 580-----*-----600-----*-----620-----*-----640-----*-----660-----*-----680----- : 596
RPL3_parad : 580-----*-----600-----*-----620-----*-----640-----*-----660-----*-----680----- : 618
Ag CgTtCAAG g TTGccCgATaATTgcaagCAAGCCAgCtGctA g gaAaGTTaAcT ctCaaCacAG aat tgcaaaCa t att at CagTGGtAAtgc

RPL3_cerev : 700-----*-----720-----*-----740-----*-----760-----*-----780-----*-----800-----*-----8 : 702
RPL3_mikat : 700-----*-----720-----*-----740-----*-----760-----*-----780-----*-----800-----*-----8 : 703
RPL3_parad : 700-----*-----720-----*-----740-----*-----760-----*-----780-----*-----800-----*-----8 : 702
ag aa aAa t GagggaTta cGcatTgAGAcAggTtTaTaa gg a gA AGC Ct a aaa TgCTGT t Tg GCagTcaTta tTG AAAAAact tc g

RPL3_cerev : 820-----*-----840-----*-----860-----*-----880-----*-----900-----*----- : 808
RPL3_mikat : 820-----*-----840-----*-----860-----*-----880-----*-----900-----*----- : 815
RPL3_parad : 820-----*-----840-----*-----860-----*-----880-----*-----900-----*----- : 799
cTcgtGc gcc aa Tg CaataTtaac tttGGtTAaccggc cga AaTa atAtaGtaat CGTc TTgta tttTTTcgggAAGCGACGCACAaCt TT

RPL3_cerev : 920-----*-----940-----*-----960-----*-----980-----*-----1000-----*-----1020----- : 921
RPL3_mikat : 920-----*-----940-----*-----960-----*-----980-----*-----1000-----*-----1020----- : 926
RPL3_parad : 920-----*-----940-----*-----960-----*-----980-----*-----1000-----*-----1020----- : 913
TTC aTTTTTTTTTTTTTTTTtCagtgacCgTcgtCcaT GaAAAAAATTTtCattgtt tTtTcatctTttctagATATATAAAAATAcgATTTtTgAg aaTcTtT T

RPL3_cerev : 1040-----*-----1060-----*-----1080-----*-----1100-----*----- : 1000
RPL3_mikat : 1040-----*-----1060-----*-----1080-----*-----1100-----*----- : 1001
RPL3_parad : 1040-----*-----1060-----*-----1080-----*-----1100-----*----- : 1001
A a Ctea cCtTtTgTtTtc T Ttatttt TTTTgTcattTccAGAActACACAGTTAcTACAACAaTCAaTc
```









RPS28B

```
*      *      *      *      *      *      *      *      *      *
RPS28B_cer : CAAGATAAAGCGAAACCTTAGGTCAAACGCTCCGACAAABCCAAAACCATAAAGTAAGTACGTAACCGATAGAAAGTTACAGGGAATTCAGGCCA---GAAACA : 111
RPS28B_par : -----AAACCATAAAGTAAGTACGTAACCGATAGAAAGTTACAGGGAATTCAGGCCA---GAAACA : 69
RPS28B_mik : -----ACCAAAAACCATAAAGTAAGTACGTAACCGATAGAAAGTTACAGGGAATTCAGGCCA---GAAACA : 76
RPS28B_kud : -----ATCAAATGCCCAAGCAACCTAAACCATAAAGTAAGTACGTAACCGATAGAAAGTTACAGGGAATTCAGGCCA---GAAACA : 94
acc AAATCCATAAAA TAAGTAAAGTACGTAACCGATAGAAAGTTACAGGGAATTCAGGCCA---GAAACA

120      *      *      *      *      *      *      *      *      *      *
RPS28B_cer : GCGGAGGCAAAAGTGTGATCGAAGCTGTGGCTGCAACCGTGAACAGCCAGACAGCAACCTAAGCAAAAG : 186
RPS28B_par : AAGCGGCAAAAGTGTGATCGAAGCTGTGGCTGCAACCGTGAACAGCCAGACAGCAACCTAAGCAAAAG : 183
RPS28B_mik : GCGGCAAAAGTGTGATCGAAGCTGTGGCTGCAACCGTGAACAGCCAGACAGCAACCTAAGCAAAAG : 190
RPS28B_kud : SAAGCGGCAAAAGTGTGATCGAAGCTGTGGCTGCAACCGTGAACAGCCAGACAGCAACCTAAGCAAAAG : 208
gc gc ga Aaa TaaTGATCa aC GTGC AccAaCaa GA A cagtaAG ggc AA taAA AAAA t ta atgaa catg taa ctcca gaa

240      *      *      *      *      *      *      *      *      *      *
RPS28B_cer : ---TGCTTCCAGAGTGAATGAGCGAAAGAAATTAAGTATGACCGCTAAAGTATCTCTCCAGTCCCAAAAAGCAAGGAAAGTTTCTGATTCAAGTGTAGTAAAA : 297
RPS28B_par : AACTGCTTCCAGAGTGAATGAGCGAAAGAAATTAAGTATGACCGCTAAAGTATCTCTCCAGTCCCGAAAAGCAAGGAAAGTTTCTGATTCAAGTGTAGTAAAA : 297
RPS28B_mik : AACTGCTTCCAGAGTGAATGAGCGAAAGAAATTAAGTATGACCGCTAAAGTATCTCTCCAGTCCCGAAAAGCAAGGAAAGTTTCTGATTCAAGTGTAGTAAAA : 301
RPS28B_kud : AACTGCTTCTCGAAGTGAATGAGCGAAAGAAATTAAGTATGACCGCTAAAGTATCTCTCCAGTCCCGAAAAGCAAGGAAAGTTTCTGATTCAAGTGTAGTAAAA : 319
aa TGcttCCagAtGT AATGaa G AAaGaaATTAc A agATgacgCTAaA TATctcttgA t aaaaa AACGAAC TTTat ATTC AG gTAgTAGAAAA

360      *      *      *      *      *      *      *      *      *      *
RPS28B_cer : CATACCCGCGCGCAAAAGAGTGTACACATTTGACCAATTAACATATTTTGGAAATGACCAAGTGTATGCGCTCCCGAAGATTTTCGCTT---CCTGGCAGAAAT : 408
RPS28B_par : CATACCCGCGCGCAAAAGAGTGTACACATTTGACCAATTAACATATTTTGGAAATGACCAAGTGTATGCGCTCCCGAAGATTTTCGCTT---CCTGGCAGAAAT : 408
RPS28B_mik : CATACCCGCGCGCAAAAGAGTGTACACATTTGACCAATTAACATATTTTGGAAATGACCAAGTGTATGCGCTCCCGAAGATTTTCGCTT---CCTGGCAGAAAT : 412
RPS28B_kud : CATACCGCGCGCAAAAGAGTGTACACATTTGACCAATTAACATATTTTGGAAATGACCAAGTGTATGCGCTCCCGAAGATTTTCGCTT---CCTGGCAGAAAT : 421
CATAccC Cca A AAAGA t aacaaTTGTAACATTaCa ATAtttTGGAAATC AccAcTgtT T GaCtT t tTcACC CatGgAtCaTCTGcT CCTGgtCAGAAT

460      *      *      *      *      *      *      *      *      *      *
RPS28B_cer : AACTTACCAAAACCTCAAGAACAAATTTATATCTCATATAAATCAATTTTCAAGCAATTTGGTAGAAAAATTTCCATAATAAACCAAGAGTTAAATAGAAAAATCTTAAA : 522
RPS28B_par : AACTTACCAAAACCTCAAGAACAAATTTATATCTCATATAAATCAATTTTCAAGCAATTTGGTAGAAAAATTTCCATAATAAACCAAGAGTTAAATAGAAAAATCTTAAA : 522
RPS28B_mik : AACTTACCAAAACCTCAAGAACAAATTTATATCTCATATAAATCAATTTTCAAGCAATTTGGTAGAAAAATTTCCATAATAAACCAAGAGTTAAATAGAAAAATCTTAAA : 526
RPS28B_kud : AACTTACCAAAACCTCAAGAACAAATTTATATCTCATATAAATCAATTTTCAAGCAATTTGGTAGAAAAATTTCCATAATAAACCAAGAGTTAAATAGAAAAATCTTAAA : 535
tCgtTtCaCaAaAtAAaCt CAAGAACAAATTTATAgTtCaTcAaTcAATTTTTTC AacGaaTtGGTAGAAAAATTTCC ATAATAAACCAAGAGTTAAATAG AAAATCTT AAA

580      *      *      *      *      *      *      *      *      *      *
RPS28B_cer : GAGTTGTCGAAAAAATACAAAATCTATTTCGAATTACAAGATATTTCCAGAAAGATACCAATGAGATGCTAAATTCATGGCGAGATCAAAAGACATGATCAATCTCCCG : 636
RPS28B_par : GAGTTGTCGAAAAAATACAAAATCTATTTCGAATTACAAGATATTTCCAGAAAGATACCAATGAGATGCTAAATTCATGGCGAGATCAAAAGACATGATCAATCTCCCG : 636
RPS28B_mik : GAGTTGTCGAAAAAATACAAAATCTATTTCGAATTACAAGATATTTCCAGAAAGATACCAATGAGATGCTAAATTCATGGCGAGATCAAAAGACATGATCAATCTCCCG : 640
RPS28B_kud : GAGTTGTCGAAAAAATACAAAATCTATTTCGAATTACAAGATATTTCCAGAAAGATACCAATGAGATGCTAAATTCATGGCGAGATCAAAAGACATGATCAATCTCCCG : 649
GAGTTGTCGAAAAAATACAAAATCTATTTCGAATTACAAGATATTTCCAGAAAGATACCAATGAGATGCTAAATTCATGGCGAGATCAAAAGACATGATCAATCTCCCG

700      *      *      *      *      *      *      *      *      *      *
RPS28B_cer : GAAGATCAGTTCGTTCAAGCTATTGGACAGAAATTTGTAACCAAGAGATAAATATATACATATAGCCAAATTTCTTAAATTAAGTAAAGTAAAGTAAAGTAAAGTAAAG : 750
RPS28B_par : GAAGATCAGTTCGTTCAAGCTATTGGACAGAAATTTGTAACCAAGAGATAAATATATACATATAGCCAAATTTCTTAAATTAAGTAAAGTAAAGTAAAGTAAAGTAAAG : 750
RPS28B_mik : GAAGATCAGTTCGTTCAAGCTATTGGACAGAAATTTGTAACCAAGAGATAAATATATACATATAGCCAAATTTCTTAAATTAAGTAAAGTAAAGTAAAGTAAAGTAAAG : 750
RPS28B_kud : GAAGATCAGTTCGTTCAAGCTATTGGACAGAAATTTGTAACCAAGAGATAAATATATACATATAGCCAAATTTCTTAAATTAAGTAAAGTAAAGTAAAGTAAAGTAAAG : 754
GAAGATCAGcT gTtCaTcGTAATAGGAC AGGAAATTTaataAaTaaC ag gatAAATAgTATACATAT c a TtTtTAg T AAgTt GCTAA aAA g aAtA A

820      *      *      *      *      *      *      *      *      *      *
RPS28B_cer : GG-----CAAGCTTATTGATGTTGAACTTTTTTTTCGCGAGAGATGACTCTGCGCAATC---GACAC---TTTTCGTAAGATGATCAGCGCAACTTTTGAC : 847
RPS28B_par : CA-----AAAGCTTATTGATGTTGAACTTTTTTTTCGCGAGAGATGACTCTGCGCAATC---GACAC---TTTTCGTAAGATGATCAGCGCAACTTTTTG : 844
RPS28B_mik : CA-----GGCATTTAATGCAATGAACTTTTTTTTCGCGAGAGATGACTCTGCGCAATC---GACAC---TTTTCGTAAGATGATCAGCGCAACTTTTTG : 847
RPS28B_kud : TG-----TGTTCCAAATGATGTTGAACTTTTTTTTCGCGAGAGATGACTCTGCGCAATC---GACAC---TTTTCGTAAGATGATCAGCGCAACTTTTTG : 857
a cttA a Tg Tc A t TTTTT t tc T g cctcg C AtC a C a TcCGTA AA ATGATCAGCGCAACTTTTTT

920      *      *      *      *      *      *      *      *      *      *
RPS28B_cer : AATTTTTTTTTTTCATCTGTTT---CGAGAAACCTGGACCTTTTTC---AGCAT---AGCAGT---TGCTCTCTCTCAATTAATTTTCTAGATCCGCTAGCTTTTCTCT : 956
RPS28B_par : GACATTTTTTTTTTTCATCTGTTT---CGAGAAACCTGGACCTTTTTC---AGCAT---AGCAGT---TGCTCTCTCTCAATTAATTTTCTAGATCCGCTAGCTTTTCTCT : 954
RPS28B_mik : GTCATTTTTTTTTTTCATCTGTTT---CGAGAAACCTGGACCTTTTTC---AGCAT---AGCAGT---TGCTCTCTCTCAATTAATTTTCTAGATCCGCTAGCTTTTCTCT : 959
RPS28B_kud : ACATTTTTTTTTTTCATCTGTTT---CGAGAAACCTGGACCTTTTTC---AGCAT---AGCAGT---TGCTCTCTCTCAATTAATTTTCTAGATCCGCTAGCTTTTCTCT : 960
TTTTTTTTTTCatc GTTt CgAagAaaCt GA CtTtT TgC TcCaT AgCaTtT tTgTctt CtC Att a taTtTt AGATccC gTA TtTt t

1040      *      *      *
RPS28B_cer : TGAACATTAATAAAA---ATACCAAGCAATAAAA---GAGCAGCAAAA : 1000
RPS28B_par : TCTTAAGATAAATAAAA---ATACCAAGCAATAAAA---GAGCAGCAAAA : 1000
RPS28B_mik : TCTTCTTATAAATAAAA---ATACCAAGCAATAAAA---GAGCAGCAAAA : 1000
RPS28B_kud : ---AGCATACCAAAA---ATACCAAGCAATAAAA---GAGCAGCAAAA : 999
t t ttAaTA AAA aa CAA gCAaaaa GAgCAGCAaaA
```

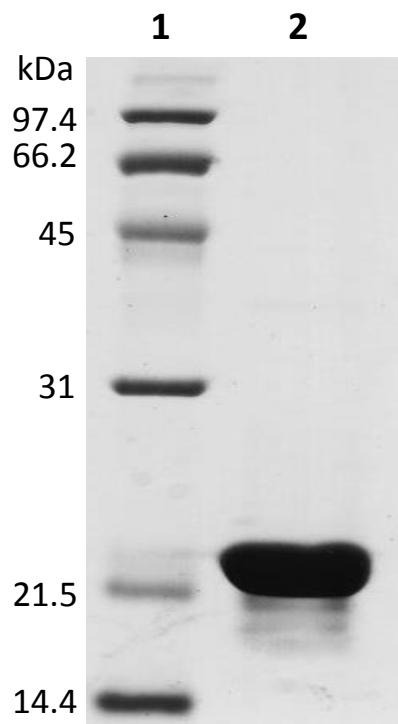

**Supplementary Figure S2.**

SDS-PAGE analysis on a 12% polyacrylamide denaturing gel of the purified His-tagged Fhl1 forkhead domain (FHD). Lane 1) protein markers; lane 2) His6-tagged FHD. Gel was stained with Coomassie blue dye.

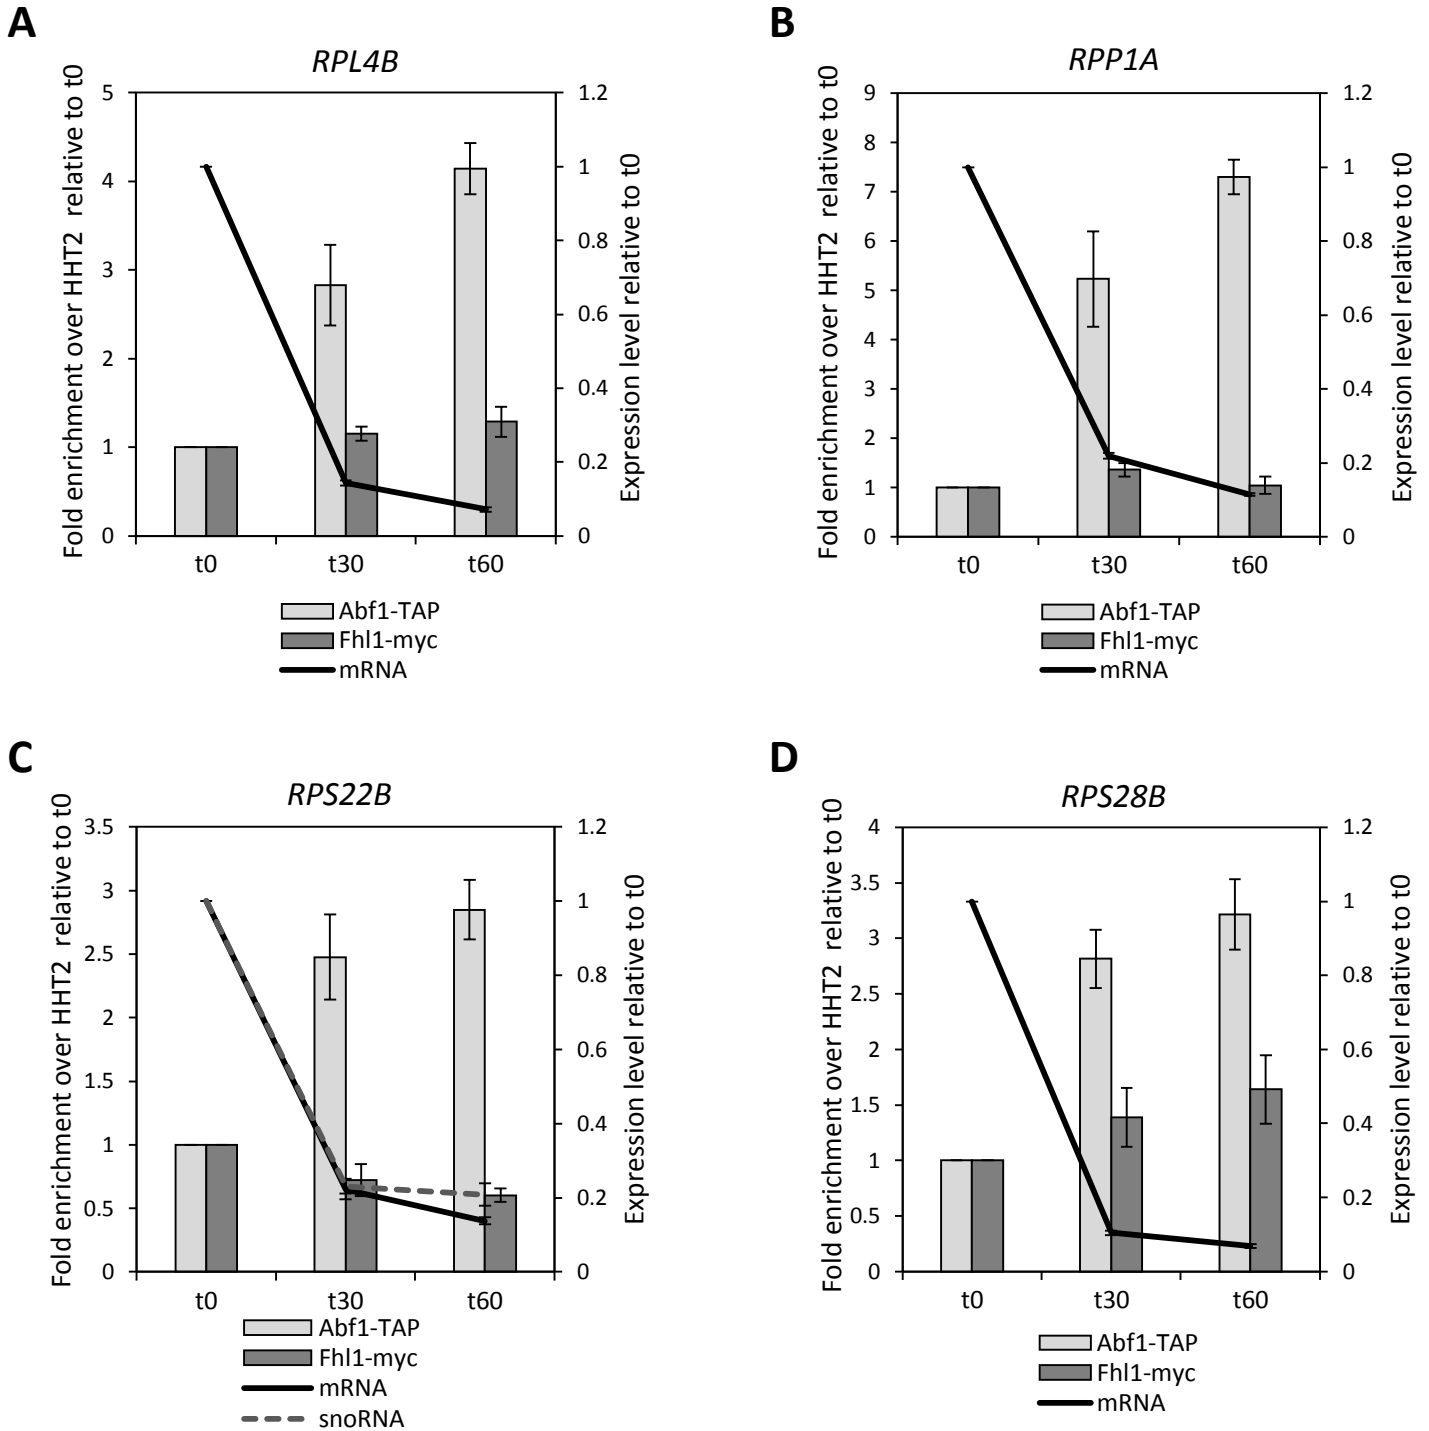

### Supplementary Figure S3.

Abf1 and Fhl1 association with RPG promoters and expression level analysis after rapamycin treatment. Exponentially growing *ABF1* TAP-tagged or *FHL1* myc-tagged cells were treated with rapamycin (200 ng/ml). After 30 or 60 min of incubation, cells were collected for expression and ChIP analyses of *RPL4B* (A), *RPP1A* (B), *RPS22B* (C) and *RPS28B* (D) genes. Left y axis, Abf1 and Fhl1 enrichment (light grey and dark grey bars, respectively); right y axis, gene expression levels (black line; dotted grey line in panel C indicates *SNR44* expression level) are reported as relative to untreated cells (t0). Data were collected from three independent replicates and are presented as mean value  $\pm$ SEM.



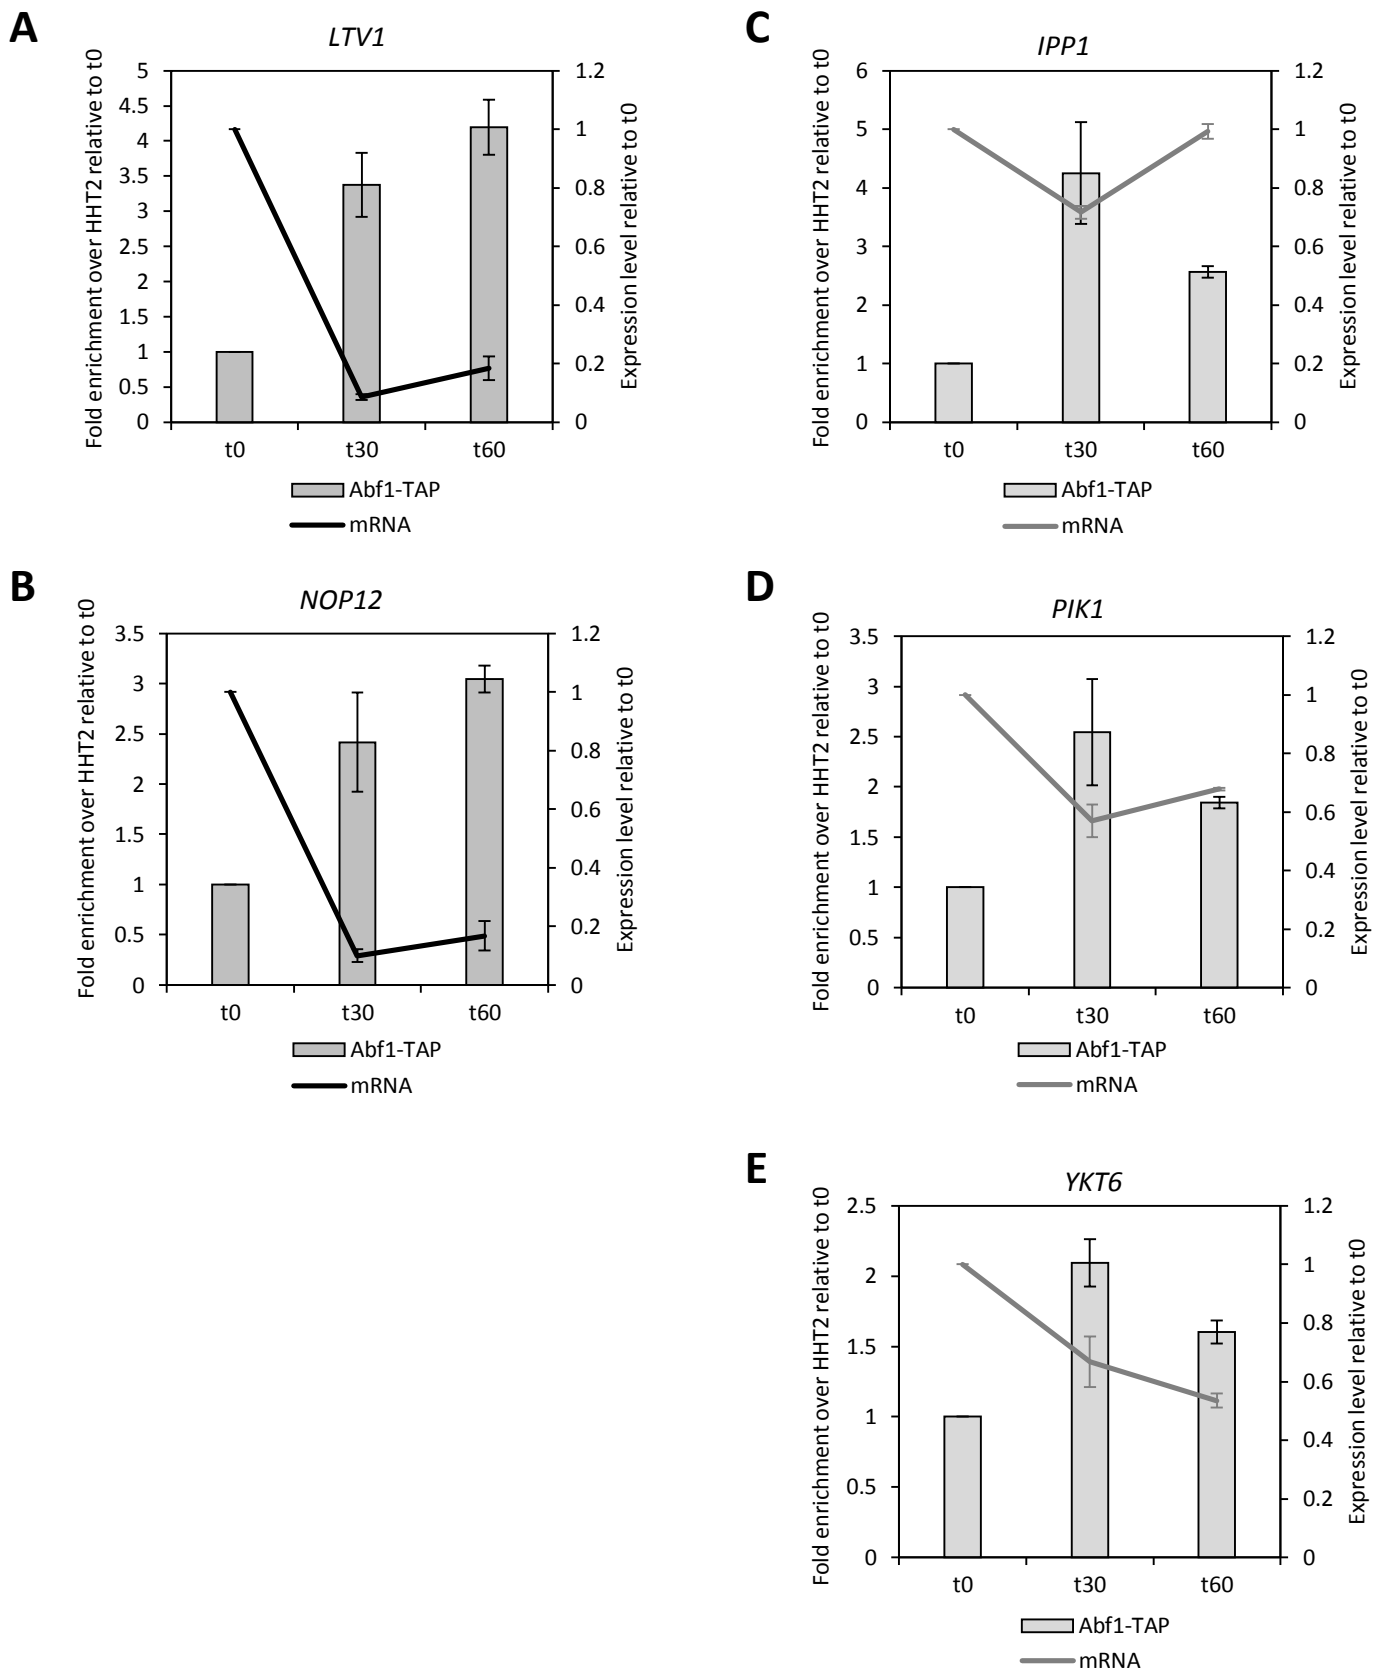

### Supplementary Figure S4.

Abf1 association with Rib1 and RP-unrelated promoters and expression level analysis after rapamycin treatment. Exponentially growing *ABF1* TAP-tagged cells were treated with rapamycin (200 ng/ml). After 30 or 60 min of incubation, cells were collected for expression and ChIP analyses of two Rib1 genes, *LTV1* (A) and *NOP12* (B), and of three RP-unrelated Abf1 targets, *IPP1* (C), *PIK1* (D), *YKT6* (E). Both Abf1 enrichment (left y axis) and gene expression levels (right y axis) are reported as relative to untreated cells (t0). Data were collected from three independent replicates and are presented as mean value  $\pm$  SEM.

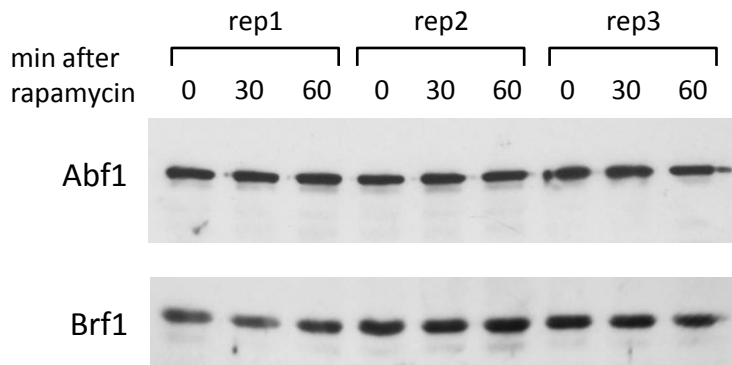

**Supplementary Figure S5.**

Abf1 protein levels remain unaltered upon rapamycin treatment. Exponentially growing cells (Abf1-TAP strain) were treated with rapamycin (200 ng/ml). After 30 or 60 min of incubation, whole cell extracts were subjected to SDS-PAGE fractionation (8% polyacrylamide), followed by Western blotting using either anti-Abf1 polyclonal antibodies (yC-20, Santa Cruz Biotechnology) or anti-yeast Brf1 antiserum (provided by F. Pugh, The Pennsylvania State University). The results of hybridizations performed on the same nitrocellulose blot are shown. Rep1-3 refer to three independent rapamycin-treated cultures.

**Supplementary Table S1.** *S. cerevisiae* strains used in this study.

| <b>Strain</b> | <b>Relevant genotype</b>                                                                                        | <b>Source</b>   |
|---------------|-----------------------------------------------------------------------------------------------------------------|-----------------|
| BY4741        | <i>MATa his3Δ1 leu2Δ0 met15Δ0 ura3Δ0</i>                                                                        | Open Biosystems |
| Abf1-TAP      | <i>MATa his3Δ1 leu2Δ0 met15Δ0 ura3Δ0 ABF1-TAP-HIS3MX6</i>                                                       | Open Biosystems |
| Tbf1-TAP      | <i>MATa his3Δ1 leu2Δ0 met15Δ0 ura3Δ0 ABF1-TAP-HIS3MX6</i>                                                       | Open Biosystems |
| Fhl1-13myc    | <i>MATa his3Δ1 leu2Δ0 met15Δ0 ura3Δ0 FHL1-13MYC-KANMX6</i>                                                      | This study      |
| ΔRPL4B        | <i>MATa his3Δ1 leu2Δ0 met15Δ0 ura3Δ0 ABF1-TAP-HIS3MX6 RPL4B::URA3</i>                                           | This study      |
| RPL4B Amut    | <i>MATa his3Δ1 leu2Δ0 met15Δ0 ura3Δ0 ABF1-TAP-HIS3MX6 RPL4B Abf1 bs mut YEplac 181</i>                          | This study      |
| RPL4B Fmut    | <i>MATa his3Δ1 leu2Δ0 met15Δ0 ura3Δ0 ABF1-TAP-HIS3MX6 RPL4B Fhl1 bs mut YEplac 181</i>                          | This study      |
| RPL4B AFmut   | <i>MATa his3Δ1 leu2Δ0 met15Δ0 ura3Δ0 ABF1-TAP-HIS3MX6 RPL4B Abf1 bs mut Fhl1 bs mut YEplac 181</i>              | This study      |
| ΔRPP1A        | <i>MATa his3Δ1 leu2Δ0 met15Δ0 ura3Δ0 ABF1-TAP-HIS3MX6 RPP1A::URA3</i>                                           | This study      |
| RPP1A Amut    | <i>MATa his3Δ1 leu2Δ0 met15Δ0 ura3Δ0 ABF1-TAP-HIS3MX6 RPP1A Abf1 bs mut YEplac 181</i>                          | This study      |
| RPP1A Fmut    | <i>MATa his3Δ1 leu2Δ0 met15Δ0 ura3Δ0 ABF1-TAP-HIS3MX6 RPP1A Fhl1 bs mut YEplac 181</i>                          | This study      |
| RPP1A AFmut   | <i>MATa his3Δ1 leu2Δ0 met15Δ0 ura3Δ0 ABF1-TAP-HIS3MX6 RPP1A Abf1 bs mut Fhl1 bs mut YEplac 181</i>              | This study      |
| ΔRPS22B       | <i>MATa his3Δ1 leu2Δ0 met15Δ0 ura3Δ0 ABF1-TAP-HIS3MX6 RPS22B::URA3</i>                                          | This study      |
| RPS22B Amut   | <i>MATa his3Δ1 leu2Δ0 met15Δ0 ura3Δ0 ABF1-TAP-HIS3MX6 RPS22B Abf1 bs mut YEplac 181</i>                         | This study      |
| RPS22B Fmut   | <i>MATa his3Δ1 leu2Δ0 met15Δ0 ura3Δ0 ABF1-TAP-HIS3MX6 RPS22B Fhl1 bs mut YEplac 181</i>                         | This study      |
| RPS22B Tmut   | <i>MATa his3Δ1 leu2Δ0 met15Δ0 ura3Δ0 ABF1-TAP-HIS3MX6 RPS22B Tbf1 bs mut YEplac 181</i>                         | This study      |
| RPS22B AFmut  | <i>MATa his3Δ1 leu2Δ0 met15Δ0 ura3Δ0 ABF1-TAP-HIS3MX6 RPS22B Abf1 bs mut Fhl1 bs mut YEplac 181</i>             | This study      |
| RPS22B TAFmut | <i>MATa his3Δ1 leu2Δ0 met15Δ0 ura3Δ0 ABF1-TAP-HIS3MX6 RPS22B Abf1 bs mut Fhl1 bs mut Tbf1 bs mut YEplac 181</i> | This study      |
| ΔRPS28B       | <i>MATa his3Δ1 leu2Δ0 met15Δ0 ura3Δ0 ABF1-TAP-HIS3MX6 RPS28B::URA3</i>                                          | This study      |
| RPS28B Amut   | <i>MATa his3Δ1 leu2Δ0 met15Δ0 ura3Δ0 ABF1-TAP-HIS3MX6 RPS28B Abf1 bs mut YEplac 181</i>                         | This study      |
| RPS28B Fmut   | <i>MATa his3Δ1 leu2Δ0 met15Δ0 ura3Δ0 ABF1-TAP-HIS3MX6 RPS28B Fhl1 bs mut YEplac 181</i>                         | This study      |
| RPS28B AFmut  | <i>MATa his3Δ1 leu2Δ0 met15Δ0 ura3Δ0 ABF1-TAP-HIS3MX6 RPS28B Abf1 bs mut Fhl1 bs mut YEplac 181</i>             | This study      |

**Supplementary Table S2.** Oligonucleotides used in this study.

| Name               | Sequence (from 5')                                               | Use                               |
|--------------------|------------------------------------------------------------------|-----------------------------------|
| Fhl1_F2            | GGGTACTACTGAAGTAAATGTATCCCTTGAGGAAAACTTCGGATCCCC<br>GGGTAAATTA   | <i>FHL1</i> tagging               |
| Fhl1_R2            | AAGATTTATGCTTCTACTTTCGAATATGCTAATACTATTATGAATTCGAG<br>CTCGTTAAAC | <i>FHL1</i> tagging               |
| RPL4B::URA3_fw1    | GGTATTCATCTTACAGGAATTTTTGAGAGCTCGTTTTATTAGG                      | Gene disruption                   |
| RPL4B::URA3_rev1   | CAGCCTTTTCAGAAACAGCGTAAGCGATCCCAATACAACAGAT                      | Gene disruption                   |
| RPL4B::URA3_fw2    | TAAGTCCTGCCTTATTATATCGTAACGGTATTCATCTTACAGGAATTTTTG              | Gene disruption                   |
| RPL4B::URA3_rev2   | CAGGATTCAGCGGAGGTTTGGTGACCAGCCTTTTCAGAAACAGCG                    | Gene disruption                   |
| RPP1A::URA3_fw1    | GAAGCCTTAACCCTGTAGCCTCATCAGAGCTCGTTTTATTAGG                      | Gene disruption                   |
| RPP1A::URA3_rev1   | AAGCCTTAGCAAAAATATCAGCCAGATCCCAATACAACAGAT                       | Gene disruption                   |
| RPP1A::URA3_fw2    | ATCTTGCTAATACTTCATTTAAAAGAAGCCTTAACCCTGTAGCC                     | Gene disruption                   |
| RPP1A::URA3_rev2   | AAGTCCTCAAGTTTTGGCCGTCAAAGCCTTAGCAAAAATATCA                      | Gene disruption                   |
| RPS22B::URA3_fw1   | CGCAGTAATCTAGAACCCTAACTTTTTTCAGAGCTCGTTTTATTAGG                  | Gene disruption                   |
| RPS22B::URA3_rev1  | CCGAACCTAAGAACATTTACATTTCAATATGATCCCAATACAACAGAT                 | Gene disruption                   |
| RPS22B::URA3_fw2   | TCATTATTCTTATGCATTACGTTTCGCAGTAATCCTAG                           | Gene disruption                   |
| RPS22B::URA3_rev2  | CTCTTGTAACAATATCCAAGTTCAACCGAACTTAAGAAC                          | Gene disruption                   |
| RPS28B::URA3_fw1   | GCTAGTACTCTGGCAATCGACACTTAGAGCTCGTTTTATTAGG                      | Gene disruption                   |
| RPS28B::URA3_rev1  | CTTCACGTTTCAGATTCATCAAGACGATCCCAATACAACAGAT                      | Gene disruption                   |
| RPS28B::URA3_fw2   | TCGAATCTTTTTTTCTCGCAGAGCTAGTACTCTGGCAATCG                        | Gene disruption                   |
| RPS28B::URA3_rev2  | ATATACCTTTAACGCAAACGACGAGCTTCACGTTTCAGATTCCATC                   | Gene disruption                   |
| RPL4B fw           | GCATAGTTCATTTCGACAGCTTGG                                         | Gene replacement/<br>pGEM cloning |
| RPL4B rev          | GCAGTAGCAGCAATAGCAGAAGC                                          | Gene replacement/<br>pGEM cloning |
| RPL4B Abf1mut fw   | TCCGTTAGAAATCGACTTATTTCTAAAGCATCGC                               | Gene replacement                  |
| RPL4B Abf1mut rev  | GCGATGCTTTAGGAAATAAGTCGATTTCTAACGGA                              | Gene replacement                  |
| RPL4B Fhl1mut fw   | AAAGCATCGCGCAGCCTCGATTTTTTAAACATTTT                              | Gene replacement                  |
| RPL4B Fhl1mut rev  | AATGTTAAAAAATCGAGGCTGCGGATGCTTT                                  | Gene replacement                  |
| RPP1A fw           | CGAATGCGACGTTTCCTGCC                                             | Gene replacement/<br>pGEM cloning |
| RPP1A rev          | GTCGTCATCGGATTCTTCTTTAGC                                         | Gene replacement/<br>pGEM cloning |
| RPP1A Abf1mut fw   | GTCTGCTACATCGCCTGAGGTCCTAATATCGTAAG                              | Gene replacement                  |
| RPP1A Abf1mut rev  | CTTACGATATTAGGACCTCAGGCGATGTAGCAGAC                              | Gene replacement                  |
| RPP1A Fhl1mut fw   | ATCGTAAGATGATACCTCTCGACTTTGTAATGATT                              | Gene replacement                  |
| RPP1A Fhl1mut rev  | AATCATTACAAAGTCGAGAGGTATCATCTTACGAT                              | Gene replacement                  |
| RPS22B fw          | CAAGTATGATCCGTTATTCTTCTCG                                        | Gene replacement/<br>pGEM cloning |
| RPS22B rev         | TATTATCGGTTACAGTGGTCTTGAAAA                                      | Gene replacement/<br>pGEM cloning |
| RPS22B Abf1mut fw  | CTAAAATTACACTAAAAAATATCGGACGCAACT                                | Gene replacement                  |
| RPS22B Abf1mut rev | AGTTGCGTCCGATAITTTTTAGTGTAATTTAG                                 | Gene replacement                  |
| RPS22B Fhl1mut fw  | TCAAAAATGACGGCCTCGACTTTTCTCAGAAATT                               | Gene replacement                  |
| RPS22B Fhl1mut rev | AATTTCTGAGAAAAGTCGAGCCGTCATTTTTGA                                | Gene replacement                  |
| RPS22B Tbf1mut fw  | GTAATCCTAGAAACAGATCTTTTTCTAAAATTAC                               | Gene replacement                  |
| RPS22B Tbf1mut rev | GTAATTTTAGAAAAAGATCTGTTTCTAGGATTAC                               | Gene replacement                  |

|                            |                                      |                                   |
|----------------------------|--------------------------------------|-----------------------------------|
| RPS22B Abf1mut Fhl1mut fw  | TTCTAAAATTACTACTAAAAAATATCGGCCTCGACT | Gene replacement                  |
| RPS22B Abf1mut Fhl1mut rev | AGTCGAGGCCGATATTTTTTAGTGTAATTTAGAA   | Gene replacement                  |
| RPS28B fw                  | CAGAATGATACCAATGAGATGC               | Gene replacement/<br>pGEM cloning |
| RPS28B rev                 | TGTTTAGATGAGCTTACCAACG               | Gene replacement/<br>pGEM cloning |
| RPS28B Abf1mut fw          | CGACACTTATTTAGGACAAAAGGCACACGCAACTT  | Gene replacement                  |
| RPS28B Abf1mut rev         | AAGTTGCGTGTGCCTTTGTCCTAAATAAGTGTCG   | Gene replacement                  |
| RPS28B Fhl1mut fw          | TTTCGTACAAAATGATCTCTCGACTTTTGACAATT  | Gene replacement                  |
| RPS28B Fhl1mut rev         | AATTGTCAAAAAGTCGAGAGATCATTGTGACGAAA  | Gene replacement                  |
| RPS28B Abf1mut Fhl1mut fw  | TTTAGGACAAAAGGCACTCTCGACTTTTGACAATT  | Gene replacement                  |
| RPS28B Abf1mut Fhl1mut rev | AATTGTCAAAAAGTCGAGAGTGCCTTTGTCCTAAA  | Gene replacement                  |
| RPL3_fw_ChIP               | GGCCGGACAGTAATATAGTAATCG             | ChIP-qPCR                         |
| RPL3_rev_ChIP              | TTTTTCATGGACGATGATCACTG              | ChIP-qPCR                         |
| RPL4B_fw_ChIP              | GAAGGCATGAATTGTCTATTCCG              | ChIP-qPCR                         |
| RPL4B_rev_ChIP             | CATGAAAACCTTTCCAGAGTACTTGA           | ChIP-qPCR                         |
| RPP1A_fw_ChIP              | CCCTGTAGCCTCATCTATGTCTG              | ChIP-qPCR                         |
| RPP1A_rev_ChIP             | TTCAAATACCATGTAAAGGCATTC             | ChIP-qPCR                         |
| RPS22B_fw_ChIP             | GTTTCGCAGTAATCCTAGAACCC              | ChIP-qPCR                         |
| RPS22B_rev_ChIP            | TCCAGCGTAGAAAACTTTTTAAGAG            | ChIP-qPCR                         |
| RPS28A_fw_ChIP             | TCCCAATCTTTATACCCTGCGA               | ChIP-qPCR                         |
| RPS28A_rev_ChIP            | TCCAAGTAGTTCAACGACCAAGA              | ChIP-qPCR                         |
| RPS28B_fw_ChIP             | GCTAGTACTCTGGCAATCGACAC              | ChIP-qPCR                         |
| RPS28B_rev_ChIP            | GGAGCAAAAAAGATCCAAGTTTC              | ChIP-qPCR                         |
| FLR1_ChIP_fw               | GGAGCAATAACAGTGCGAAA                 | ChIP-qPCR                         |
| FLR1_ChIP_rev              | TTATCCCGCCATTAGTCAG                  | ChIP-qPCR                         |
| LTV1_ChIP_fw               | GCTTCTTGCGTCTATTTCTGC                | ChIP-qPCR                         |
| LTV1_ChIP_rev              | TCAGTCGCGTTATACGGATTAG               | ChIP-qPCR                         |
| RPL28_ChIP_fw              | ATTTTTCTATTTTCTCTGGCG                | ChIP-qPCR                         |
| RPL28_ChIP_rev             | GATGAAAGGTTGAACCTATCTGGG             | ChIP-qPCR                         |
| NOP12_ChIP_fw              | CACGTACTGTCCTTCCTGATTTCG             | ChIP-qPCR                         |
| NOP12_ChIP_rev             | CTGAAACATCAGGTTTGCTTGCT              | ChIP-qPCR                         |
| IPP1_ChIP_fw               | CGCAGACGCTAAGGTTGTTG                 | ChIP-qPCR                         |
| IPP1_ChIP_rev              | AACTAACCTTCCTAACTTCGACGC             | ChIP-qPCR                         |
| PIK1_ChIP_fw               | CGTACTTGATAGCGTGTATAACAGGG           | ChIP-qPCR                         |
| PIK1_ChIP_rev              | GGTAGGGTCTTTTGTTCAGTGC               | ChIP-qPCR                         |
| YKT6_ChIP_fw               | GTGTTCCACAATTTACAGCATTATATG          | ChIP-qPCR                         |
| YKT6_ChIP_rev              | GTGCTTGCTCTTGATTTACACC               | ChIP-qPCR                         |
| HHT2_RT_fw                 | TCAATCTTCTGCTATCGGTGCTT              | ChIP-qPCR/<br>expression analysis |
| HHT2_RT_rev                | GCGTGAATAGCAGCCAGATTAGT              | ChIP-qPCR/<br>expression analysis |
| TAF10_exp_fw               | ACCTTTCCATCGGTTGCG                   | expression analysis               |
| TAF10_exp_rev              | CCATCATCCACTACAGCCTCTCTC             | expression analysis               |
| ALG9_exp_fw                | AATCAAGGTGGTGTGAAGGCAC               | expression analysis               |
| ALG9_exp_rev               | GATTATCTGGCAGCAGGAAAGAAC             | expression analysis               |

|                     |                              |                      |
|---------------------|------------------------------|----------------------|
| RPL4B_exp_fw        | CCTTGAAGCATGACTAGAAATTTATAGT | expression analysis  |
| RPL4B_exp_rev       | GAAAACAAAAAGGTTTGATTAAGAC    | expression analysis  |
| RPP1A_exp_fw        | GTCCAATACAACAGCTTAAACCG      | expression analysis  |
| RPP1A_exp_rev       | CAAGGCGGCGTAAGACAAAAG        | expression analysis  |
| RPS22B_exp_fw       | GACTCGCTCTTCCGTTTTAGC        | expression analysis  |
| RPS22B_exp_rev      | GGTCTCAATAGAACCTGACGTTTAC    | expression analysis  |
| SNR44_fw            | CCGGGCTGATAACTAGATGG         | expression analysis  |
| SNR44_rev           | TCCATAACCGTGTAAGAAGCA        | expression analysis  |
| RPS28B_exp_fw       | TGGTCTTGATGGAATCTGAACG       | expression analysis  |
| RPS28B_exp_rev      | CAATGCTCGAAGAGCACCAATAG      | expression analysis  |
| LTV1_exp_fw         | GTTCTGTCTCCAATCCAAATAAAA     | expression analysis  |
| LTV1_exp_rev        | AGCCCTCCTACCCTTTGGTTT        | expression analysis  |
| NOP12_exp_fw        | CACGTAAGTCCTTCCTGATTCG       | expression analysis  |
| NOP12_exp_rev       | CTGAAACATCAGGTTTGCTTGCT      | expression analysis  |
| IPP1_exp_fw         | CCTCCACGACATTCCCTTG          | expression analysis  |
| IPP1_exp_rev        | CCTTGGTGATTTCTAACTTGGCG      | expression analysis  |
| PIK1_exp_fw         | CTTCATGGAATGGCAGGTGAG        | expression analysis  |
| PIK1_exp_rev        | CGTATCCTCTCTTCTTGGTAGCC      | expression analysis  |
| YKT6_exp_fw         | GGCAGATGTGACTGAGACCAATG      | expression analysis  |
| YKT6_exp_rev        | TGATAGCGTCAGCCTGTGAAG        | expression analysis  |
| Fhl1FHD_NheI_fw     | GCTAGCAAGCCACCGAAAATACCA     | FHD sequence cloning |
| Fhl1FHD_HindIII_rev | AAGCTTTTATTTTTTGCCCTCTGCGG   | FHD sequence cloning |

**Supplementary Table S3.** Oligonucleotide primers and templates used to generate radiolabelled EMSA probes.

| Probe       | Probe length | Template          | Primers name        | Primers sequence           |
|-------------|--------------|-------------------|---------------------|----------------------------|
| RPL4B wt    | 188 bp       | pGEM::RPL4B_wt    | RPL4B_promoter_fw   | GAAGTGCCTGAAGGCATGA        |
|             |              |                   | RPL4B_promoter_rev  | GCGATTGCTGATAGGAAAGAA      |
| RPL4B Fmut  | 188 bp       | pGEM::RPL4B_Fmut  | RPL4B_promoter_fw   | GAAGTGCCTGAAGGCATGA        |
|             |              |                   | RPL4B_promoter_rev  | GCGATTGCTGATAGGAAAGAA      |
| RPP1A wt    | 172 bp       | pGEM::RPP1A_wt    | RPP1A_promoter_fw   | GCCTTAACCTGTAGCCTCA        |
|             |              |                   | RPP1A_promoter_rev  | TCAGAACAGAAGAGATCGCAAA     |
| RPP1A Fmut  | 172 bp       | pGEM::RPP1A_Fmut  | RPP1A_promoter_fw   | GCCTTAACCTGTAGCCTCA        |
|             |              |                   | RPP1A_promoter_rev  | TCAGAACAGAAGAGATCGCAAA     |
| RPS22B wt   | 151 bp       | pGEM::RPS22B_wt   | RPS22B_promoter_fw  | CATTATTCTTTATGCATTACGTTTCG |
|             |              |                   | RPS22B_promoter_rev | GAAGAGAACAATTTATCCAGCGTAG  |
| RPS22B Fmut | 151 bp       | pGEM::RPS22B_Fmut | RPS22B_promoter_fw  | CATTATTCTTTATGCATTACGTTTCG |
|             |              |                   | RPS22B_promoter_rev | GAAGAGAACAATTTATCCAGCGTAG  |
| RPS28B wt   | 161 bp       | pGEM::RPS28B_wt   | RPS28B_promoter_fw  | GGCAAGCTTATTCATGTTTCG      |
|             |              |                   | RPS28B_promoter_rev | CCAAAAGTGCTATGGAGCAA       |
| RPS28B Fmut | 161 bp       | pGEM::RPS28B_Fmut | RPS28B_promoter_fw  | GGCAAGCTTATTCATGTTTCG      |
|             |              |                   | RPS28B_promoter_rev | CCAAAAGTGCTATGGAGCAA       |
| RPL28       | 165 bp       | pGEM::RPL28       | RPL28_EMSA_fw       | CCAGGGACCCACACATTAC        |
|             |              |                   | RPL28_ChIP_rev      | GATGAAAGGTTTGAACCTATCTGGG  |
| FLR1        | 157 bp       | pGEM::FLR1        | FLR1_EMSA_fw        | ATGAAAGAAGACAAATGCAAAAG    |
|             |              |                   | FLR1_EMSA_rev       | CTGTTCCCTTTTACCTGAC        |
